# Supplementary material for: Relationship between APOE, PER2, PER3 and OX2R Genetic Variants and Neuropsychiatric Symptoms in Patients with Alzheimer’s Disease
Source: MDPI journal article supplement (doi:10.3390/ijerph20054412), 2023-03-01
Supplement: s1 [file s1]

**Supplementary Table S1.** Presence of BPSD (in percentage) in patients with AD according to NPI and PHQ-9 scales.

| Scale | Patients<br>(n=31)      | Frequency<br>(%) |
|-------|-------------------------|------------------|
| PHQ-9 | Affective               | 91               |
|       | Somatic                 | 84               |
| NPI   | Apathy                  | 84               |
|       | Anxiety                 | 81               |
|       | Irritability            | 75               |
|       | Depression              | 72               |
|       | Appetite                | 72               |
|       | Agitation               | 69               |
|       | Sleep                   | 69               |
|       | Disinhibition           | 66               |
|       | Aberrant motor behavior | 59               |
|       | Delusions               | 56               |
|       | Hallucinations          | 38               |
|       | Euphoria                | 31               |

**Supplementary Table S2.** Presence of sleep disorders (in percentage) in AD patients and controls according to the Sleeping Disorders Questionnaire.

| Sleep disorder   | Patients<br>(n=31) | Controls<br>(n=31) |
|------------------|--------------------|--------------------|
|                  | %                  | %                  |
| OSA <sup>‡</sup> | 100.00             | 100.00             |
| RLS <sup>‡</sup> | 56.30              | 67.70              |
| Hipersomnia      | 81.30              | 87.10              |
| RBD <sup>‡</sup> | 75.00              | 67.70              |

|                    |        |        |
|--------------------|--------|--------|
| Parasomnia         | 84.40  | 67.70  |
| CRSWD <sup>‡</sup> | 87.50  | 77.40  |
| PLMD <sup>‡</sup>  | 56.30  | 58.10  |
| Insomnia           | 100.00 | 100.00 |

<sup>‡</sup>OSA: Obstructive sleep apnea; RSL: restless legs syndrome; RBD: Rapid Eye Movement (REM) sleep behavior disorder; CRSWD: Circadian rhythm sleep-wake disorders; PLMD: periodic limb movement disorder.

**Supplementary Table S3.** Allelic and genotypic variant of patients and controls

| Controls/Patients              |                     |       |                       |      |
|--------------------------------|---------------------|-------|-----------------------|------|
| Genetic variant                | Allelic frequencies |       | Genotypic frequencies |      |
| PER3                           |                     |       |                       |      |
|                                |                     | p     |                       | p    |
| rs228697_C>G                   | C= 0.95/0.88        | 0.30  | CC= 0.95/0.77         | 0.30 |
|                                | G= 0.05/0.11        |       | CG= 0.04/0.22         |      |
|                                |                     |       | GG= 0.00/0.00         |      |
| rs57875989_4 or 5 repeats      | 4= 0.82/0.80        | 0.82  | 4/4= 0.64/0.65        | 1.00 |
|                                | 5= 0.18/0.19        |       | 4/5= 0.36/0.32        |      |
|                                |                     |       | 5/5= 0.00/0.03        |      |
| PER2                           |                     |       |                       |      |
| rs2304672_G>C                  | G= 0.97/0.03        | 0.65  | GG= 0.93/0.90         | 1.00 |
|                                | C= 0.03/0.05        |       | GC= 0.06/0.09         |      |
|                                |                     |       | CC= 0.00/0.00         |      |
| OX2R                           |                     |       |                       |      |
| rs9370399_A>C                  | A= 0.73/0.63        | 0.08  | AA= 0.45/0.35         | 0.11 |
|                                | C= 0.27/0.37        |       | AC= 0.54/0.54         |      |
|                                |                     |       | CC= 0.00/0.10         |      |
| rs2653349_A>G                  | A= 0.03/0.06        | 0.17  | AA= 0.00/0.03         | 1.00 |
|                                | G= 0.97/0.94        |       | AG= 0.06/0.06         |      |
|                                |                     |       | GG= 0.94/0.90         |      |
| APOE                           |                     |       |                       |      |
| rs7412_C>T and<br>rs429358_T>C | ε3= 0.92/0.84       | 0.03* | ε3/ε3= 0.84/0.72      | 0.25 |
|                                | ε4= 0.08/0.16       |       | ε4/ε4= 0.16/0.28      |      |
|                                |                     |       | ε3/ε4= 0.00/0.00      |      |

\*p-value <0.05

**Supplementary Table S4.** Characteristics of genetic variants included in the study.

| Variant <sup>‡</sup> | Location & nucleotide change                                                    | Amino acid change | Previous relevant associations                                                                                                                                                                                                                                                                                                                                                                                                                                                                                                                                                                                                                                                                                                                                                                                                                    |
|----------------------|---------------------------------------------------------------------------------|-------------------|---------------------------------------------------------------------------------------------------------------------------------------------------------------------------------------------------------------------------------------------------------------------------------------------------------------------------------------------------------------------------------------------------------------------------------------------------------------------------------------------------------------------------------------------------------------------------------------------------------------------------------------------------------------------------------------------------------------------------------------------------------------------------------------------------------------------------------------------------|
| <i>APOE gene</i>     |                                                                                 |                   |                                                                                                                                                                                                                                                                                                                                                                                                                                                                                                                                                                                                                                                                                                                                                                                                                                                   |
| rs429358             | Chr19-44908684<br>NM_000041.4<br>Exon4   c.388T>C                               | p.Cys130Arg       | Three haplotypes ( $\epsilon$ 2(388 T–526 T), $\epsilon$ 3(388 T-526C), $\epsilon$ 4(388C-526C)) and six genotypes ( $\epsilon$ 2/ $\epsilon$ 2, $\epsilon$ 2/ $\epsilon$ 3, $\epsilon$ 2/ $\epsilon$ 4, $\epsilon$ 3/ $\epsilon$ 3, $\epsilon$ 3/ $\epsilon$ 4, $\epsilon$ 4/ $\epsilon$ 4) can be formed by these SNPs [68]. <i>APOE</i> gene has three main alleles, $\epsilon$ 2, $\epsilon$ 3 and $\epsilon$ 4, coding for three corresponding isoforms of apolipoprotein E: E2, E3 and E4, respectively. The main isoform E3 and the minor isoform E4 of APOE protein have strong affinity to Low Density Lipoprotein Receptor (LDLR) and have been associated with a higher risk of Alzheimer’s disease (AD) [22]. On the contrary, E2 isoform has been described as neuroprotective, and presents low affinity for the LDL receptor [69]. |
| rs7412               | Chr19-44908810<br>NM_000041.4<br>Exon4   c.526C>T                               | p.Arg176Cys       |                                                                                                                                                                                                                                                                                                                                                                                                                                                                                                                                                                                                                                                                                                                                                                                                                                                   |
| <i>PER2 gene</i>     |                                                                                 |                   |                                                                                                                                                                                                                                                                                                                                                                                                                                                                                                                                                                                                                                                                                                                                                                                                                                                   |
| rs2304672            | Chr2-239186577-239186601<br>NM_022817.3  <br>ENST00000254657<br>5’UTR  c.-12C>G | NA                | <i>PER2</i> gene is a member of the Period family of genes and is expressed in a circadian pattern in the suprachiasmatic nucleus, the primary circadian pacemaker in the mammalian brain. This variant is associated with diurnal preference in a young Korean population [70]. It has also been associated with psychiatric illnesses involving reward dysfunction [71] and sleep disturbances [72].                                                                                                                                                                                                                                                                                                                                                                                                                                            |

|                               |                                                                                                                                                                         |                          |                                                                                                                                                                                                                                                                                                                                                                                                                                                                                                                                                                                                                                                           |
|-------------------------------|-------------------------------------------------------------------------------------------------------------------------------------------------------------------------|--------------------------|-----------------------------------------------------------------------------------------------------------------------------------------------------------------------------------------------------------------------------------------------------------------------------------------------------------------------------------------------------------------------------------------------------------------------------------------------------------------------------------------------------------------------------------------------------------------------------------------------------------------------------------------------------------|
| <b><i>PER3 gene</i></b>       |                                                                                                                                                                         |                          |                                                                                                                                                                                                                                                                                                                                                                                                                                                                                                                                                                                                                                                           |
| rs228697                      | chr1-7887579<br>NM_001377275.1<br>Exon17   c.2590C>G                                                                                                                    | p.Pro864Ala              | Individuals homozygous for the <i>PER3</i> SNP rs228697 have been described with a significantly higher anxiety [27].                                                                                                                                                                                                                                                                                                                                                                                                                                                                                                                                     |
| rs57875989                    | Chr1-7829993 inframe<br>deletion. (-<br>;GCTCTGTCCACAGGATC<br>GCCTCCCATGAAGAATC<br>CATCCCATCCTACTGCC<br>AGC) Exon 18.<br>NM_001289861.1:c.3002-13.<br>ENST00000377532.3 | p.Ala1016_S<br>er1033del | The number of repeats of 18 amino acids in positions 966 to 1055 is polymorphic and varies among at least two different alleles. Alleles corresponding in size to a <i>PER3_4</i> and 5 repeats have been described. Homozygosity for <i>PER3_5/5</i> is more likely to show morning preference, whereas homozygosity for the <i>PER3_4/4</i> associates with evening preferences. <i>PER3_5/5</i> homozygous show vulnerability to sleep loss with a greater cognitive decline in response to total sleep deprivation [73–78]. The <i>PER3</i> VNTR (rs57875989) has been significantly associated with depression in patients with mood disorders [22]. |
| <b><i>OX2R/HCRT2 gene</i></b> |                                                                                                                                                                         |                          |                                                                                                                                                                                                                                                                                                                                                                                                                                                                                                                                                                                                                                                           |
| rs9370399                     | chr6-55180227<br>NM_001384272.1<br>intron variant  <br>c.223+5417A>G                                                                                                    | NA                       | The <i>OX2R</i> gene has been considered a genetic risk factor for AD [67]. It is a candidate gene in sertraline-associated insomnia in depressed patients [79], and its genetic variants have also been associated with self-reporting of being a morning person [80].                                                                                                                                                                                                                                                                                                                                                                                   |
| rs2653349                     | chr6-55277539<br>NM_001384272.1<br>Exon 5   c.922A>G                                                                                                                    | p.Ile308Val              | The <i>OX2R</i> gene has been considered a genetic risk factor for AD. Thus, the carriage of the G allele was associated with an increased AD risk (OR=2.53; CI95%=1.10-5.80) [56]. A genome-wide functional enrichment pathway analysis has revealed that this gene may be associated with hypersomnia symptoms of bipolar depression [56].                                                                                                                                                                                                                                                                                                              |

<sup>‡</sup>NCBI database of genetic variation, dbSNP. SNP, single nucleotide polymorphism. NA, not applicable. Additional information was obtained at Varsome and Franklin databases.

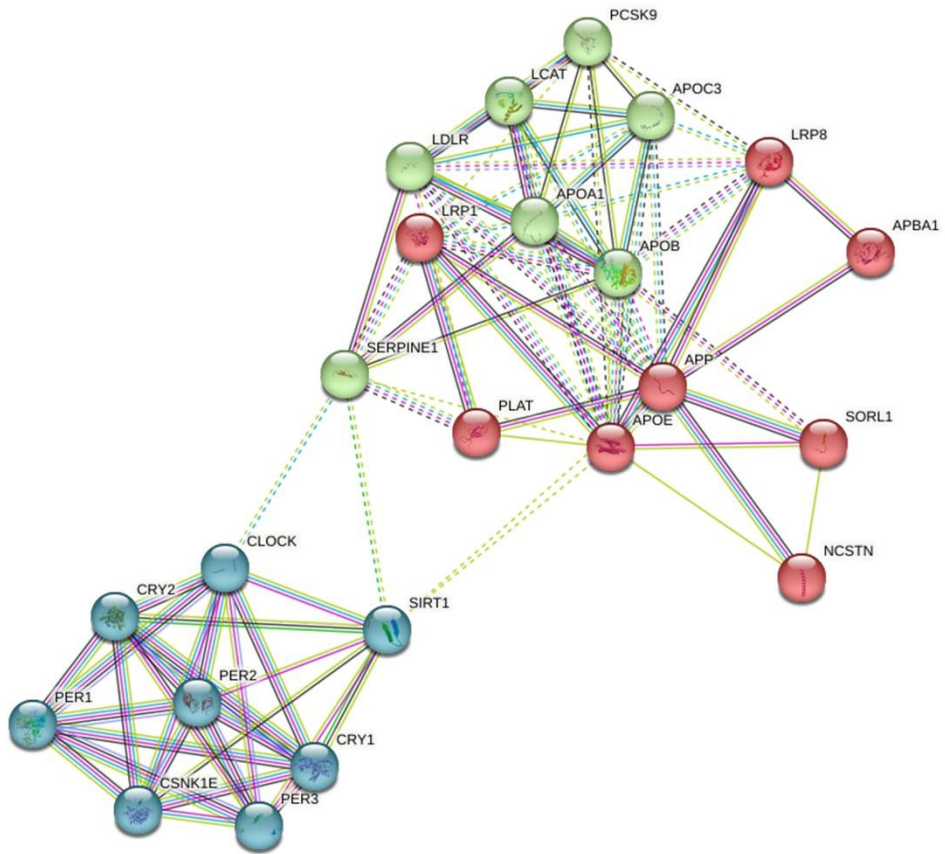

Figure S1. Protein-protein interaction of PERIOD2 and PERIOD3 with APOE. This indirect interaction is mediated by SIRTUIN1.
